# Supplementary material
Source: PubMed Central journal article supplement (PMC6596423)
Supplement: NIHMS1028021-supplement-SI2.pdf [file NIHMS1028021-supplement-SI2.pdf]

## Supporting Information

# **Structures, Spectroscopic Properties, and Dioxygen reactivity of 5- and 6-coordinate Nonheme Iron(II) Complexes: A Combined Enzyme/Model Study of Thiol Dioxygenases**

Jesse B. Gordon<sup>†</sup>, Jeremy P. McGale<sup>†</sup>, Joshua R. Prendergast<sup>‡</sup>, Zahra Shirani-Sarmazeh<sup>‡</sup>, Maxime  
A. Siegler<sup>†</sup>, Guy N. L. Jameson<sup>\*\*</sup>, David P. Goldberg<sup>\*\*</sup>

<sup>†</sup>Department of Chemistry, The Johns Hopkins University, 3400 North Charles Street,  
Baltimore, Maryland, 21218, USA

<sup>‡</sup>School of Chemistry, Bio21 Molecular Science and Biotechnology Institute, The University of Melbourne, 30  
Flemington Road, Parkville, Victoria 3010, Australia

## Table of Contents

|                                                             |                 |
|-------------------------------------------------------------|-----------------|
| Coordinates for DFT-calculated models                       | <b>S3 – 22</b>  |
| Coordinates for DFT-calculated models for calibration curve | <b>S23 – 31</b> |

S1. Optimized coordinates for **1** calculated using BP86.

|    | X                 | Y                | Z                 |
|----|-------------------|------------------|-------------------|
| Fe | 1.55025232467590  | 3.81832124656423 | 1.85515561631413  |
| S  | -0.38136228956202 | 4.84385007439815 | 0.85102500736694  |
| N  | 3.38206412947050  | 2.86437433769840 | 2.80740991242341  |
| N  | 2.34094257692502  | 2.66704470348407 | 0.10710709943851  |
| N  | 3.18093900043017  | 5.23809014498616 | 1.14109647296172  |
| N  | 0.76597304984783  | 4.95921250143381 | 3.60246403623916  |
| O  | 0.48642956962921  | 2.03850621360958 | 2.60706589063529  |
| C  | -0.53981224355016 | 6.22997486191714 | 1.95848246465772  |
| C  | 3.20721607835317  | 2.58852692248660 | 4.25267964650866  |
| C  | 3.49279710313271  | 1.57850508922803 | 2.06150258985073  |
| C  | 4.57691256130880  | 3.74204185650921 | 2.59857952952023  |
| C  | 1.27495073793473  | 1.85535076775027 | -0.52835485721584 |
| C  | 3.47570456407587  | 1.78717939654037 | 0.54199054703408  |
| C  | 2.78750892343976  | 3.73324768923827 | -0.83220073876744 |
| C  | 2.71335713711442  | 6.63654597241841 | 0.97526260614742  |
| C  | 3.73788622930538  | 4.72989943876517 | -0.15765427201162 |
| C  | 4.17512281719336  | 5.17777338042872 | 2.24997236749348  |
| C  | 0.06716106642618  | 6.17811151022568 | 3.24131721247094  |
| H  | 1.36230928127663  | 5.13339548468965 | 4.42290136600255  |
| H  | 0.06504936559872  | 4.25796743666112 | 3.92084463570868  |
| S  | -0.89522980391574 | 1.78064460216822 | 3.16606751233570  |
| C  | -1.22628003137420 | 7.41180017421343 | 1.59975708466786  |
| H  | 2.28006471012319  | 2.01735984976357 | 4.40569287328219  |
| H  | 3.13750239656316  | 3.54032698937931 | 4.80277597680191  |
| H  | 4.06187321976751  | 2.01099098633224 | 4.66017096559958  |
| H  | 2.62936303795312  | 0.96567770784915 | 2.36549337245374  |
| H  | 4.41634910479117  | 1.02921793484296 | 2.34343208998277  |
| H  | 5.21293199243083  | 3.31308413530116 | 1.80762670926705  |
| H  | 5.20334647583398  | 3.76343260300039 | 3.50918343992572  |
| H  | 0.43792313980510  | 2.51059872157447 | -0.81763230270654 |
| H  | 0.90442586821947  | 1.11338334778070 | 0.19410974199678  |
| H  | 1.65425162231970  | 1.33547225685080 | -1.43111718263245 |
| H  | 4.42424725899142  | 2.23103568718827 | 0.20290133900502  |
| H  | 3.40625945579408  | 0.80194673312135 | 0.04766973852522  |
| H  | 1.87793094991335  | 4.25902669976008 | -1.16969452977685 |
| H  | 3.28116129983444  | 3.30031569374970 | -1.72692390542265 |
| H  | 2.23772968752563  | 6.98116888247024 | 1.90550694061004  |
| H  | 1.96636338996942  | 6.67583160199436 | 0.16831026334582  |
| H  | 3.55968979366886  | 7.30849786835303 | 0.72977887535481  |
| H  | 4.72252950345184  | 4.27002691143267 | 0.02310298602215  |
| H  | 3.92058326170792  | 5.57404058338560 | -0.84586540438780 |
| H  | 3.70230473951376  | 5.65837252166164 | 3.12384743521004  |

|   |                   |                   |                  |
|---|-------------------|-------------------|------------------|
| H | 5.08286534072771  | 5.76658405409875  | 2.00325688226053 |
| C | 0.01195924024387  | 7.27962401209014  | 4.11084187101684 |
| C | -0.60342585587664 | 0.22427936842379  | 4.21128776582483 |
| O | -1.32158580013645 | 2.81136229844004  | 4.15876446587573 |
| O | -1.90823242892562 | 1.36062624416622  | 2.17147150205887 |
| H | -1.70017168236511 | 7.46612852055987  | 0.61382395086489 |
| C | -1.28464802145039 | 8.51132642602695  | 2.47006802371829 |
| C | -0.65781802032266 | 8.45378632646770  | 3.72721638388395 |
| H | 0.48806421148876  | 7.21165508802319  | 5.09639522326740 |
| F | 0.26518904786659  | 0.47720234767624  | 5.21249407248123 |
| F | -1.76683489860676 | -0.19016572717072 | 4.75128883749724 |
| F | -0.10324281980466 | -0.76775726034605 | 3.44966264009598 |
| H | -1.81345297282668 | 9.41944254010975  | 2.16036222673933 |
| H | -0.69553839592615 | 9.30966424022776  | 4.40926500217604 |

S2. Optimized coordinates for **2** calculated using BP86.

|    | X                 | Y                | Z                 |
|----|-------------------|------------------|-------------------|
| Fe | 3.21538099255514  | 3.63378423846588 | 11.16127968290790 |
| S  | 5.18065659553849  | 2.26517368037541 | 11.45131372724795 |
| N  | 1.71269122456055  | 2.02501090953640 | 10.74245433376164 |
| N  | 2.18170843372223  | 3.32109173944490 | 13.17858215438898 |
| N  | 1.42471823611427  | 4.92150470748729 | 10.83444640307862 |
| N  | 4.20488484414789  | 3.93547288163452 | 9.17590534978315  |
| O  | 4.15305776880752  | 5.49718034211556 | 11.85932594677096 |
| C  | 5.55139834614876  | 1.96497582177687 | 9.74537974816008  |
| C  | 2.01081625747071  | 1.26833659982783 | 9.50201537813779  |
| C  | 1.84448240123595  | 1.12649362382971 | 11.92147756280123 |
| C  | 0.34544512085610  | 2.62814817055869 | 10.65815050530203 |
| C  | 3.14694470949321  | 3.64531031771967 | 14.26209377487038 |
| C  | 1.75033821870149  | 1.88517392232953 | 13.27015251299912 |
| C  | 1.00610263900672  | 4.25736062590142 | 13.25540904819043 |
| C  | 1.64248130336366  | 6.13228038497008 | 10.00302395963196 |
| C  | 1.05766264545920  | 5.37523107527831 | 12.20809464419346 |
| C  | 0.39490240769294  | 4.07789584354742 | 10.16062554100931 |
| C  | 5.01140423863922  | 2.81684890044579 | 8.73917226322112  |
| H  | 4.84180586712894  | 4.70904004383199 | 9.45838593668288  |
| H  | 3.66175991939533  | 4.30442715028012 | 8.38406349827361  |
| S  | 5.54350523788290  | 6.08520707905182 | 11.74530129329766 |
| C  | 6.35410081786993  | 0.87769035283800 | 9.32899553284973  |
| H  | 1.31594749571972  | 0.41341712087417 | 9.38555639901459  |
| H  | 2.83420215760584  | 0.65074502293130 | 11.83385033883859 |
| H  | 1.07686989113911  | 0.32641458707605 | 11.88801569592940 |
| H  | -0.13482651744594 | 2.55953963307364 | 11.64224863252305 |
| H  | -0.28750014541255 | 2.03744665406010 | 9.96966213124388  |
| H  | 2.69493976118432  | 3.48922546063850 | 15.26219966231620 |
| H  | 3.46026482140147  | 4.69466369004128 | 14.16060023003739 |
| H  | 4.03909244845546  | 3.00743898840022 | 14.16305665572960 |
| H  | 0.72760329069497  | 1.83284527579497 | 13.68329244776334 |
| H  | 2.40029660386223  | 1.36320660128050 | 13.99004719712928 |
| H  | 0.96918928188441  | 4.72931661761683 | 14.25555703593585 |
| H  | 0.07424620656414  | 3.68301447191043 | 13.16149391939147 |
| H  | 0.71303370258435  | 6.73073074629173 | 9.91147596646948  |
| H  | 1.96597012253715  | 5.83733175584695 | 8.99237156118103  |
| H  | 2.42541306830582  | 6.75140631573973 | 10.46304720349777 |
| H  | 0.07999971026481  | 5.90247349122090 | 12.19977715510415 |
| H  | 1.82966926396571  | 6.10610978319747 | 12.49617759415600 |
| H  | 0.65265885777155  | 4.07571205244133 | 9.08763989242899  |
| H  | -0.61217559392036 | 4.53662512825117 | 10.25014278198979 |
| C  | 5.24167952941321  | 2.56276126151132 | 7.38382892913898  |

|   |                  |                   |                   |
|---|------------------|-------------------|-------------------|
| C | 5.19631205107155 | 7.93691250941796  | 11.96924501116855 |
| O | 6.46132536976800 | 5.75317654470471  | 12.85832169916965 |
| O | 6.10231657898590 | 5.98027679318485  | 10.36438650864581 |
| H | 6.78234909433489 | 0.21556663114446  | 10.08814385073723 |
| C | 6.58993595613542 | 0.61976908519013  | 7.97380602025976  |
| C | 6.02578116438141 | 1.45809352712196  | 6.99456531832163  |
| H | 4.81925009507289 | 3.23370943026936  | 6.62770634267827  |
| F | 6.35567237000228 | 8.62358545368188  | 11.96484758649820 |
| F | 4.56681523252341 | 8.15865697282731  | 13.13904207066959 |
| F | 4.42038611653785 | 8.40214564642029  | 10.96831755505693 |
| H | 7.20417205130974 | -0.23612562858985 | 7.68042942972961  |
| C | 6.23948150653723 | 1.20440268940944  | 5.53122212613521  |
| F | 5.06594598043336 | 0.93703632281606  | 4.86913309409027  |
| F | 6.77977679811458 | 2.28736555615898  | 4.88538046854251  |
| F | 7.06790717422025 | 0.15292405371628  | 5.28734678967731  |
| H | 1.90318870277163 | 1.93274471744969  | 8.63036336864910  |
| H | 3.04376157543306 | 0.89191662563064  | 9.53871253259158  |

**S3.** Optimized coordinates for **3** calculated using BP86.

|    | <b>X</b>          | <b>Y</b>          | <b>Z</b>          |
|----|-------------------|-------------------|-------------------|
| Fe | 2.42363201726016  | 17.65442641480675 | 7.06908061108311  |
| S  | 1.19111785777085  | 19.42197866182359 | 8.09622267180309  |
| C  | 3.14897744385383  | 15.40561103428952 | 9.06441532938430  |
| H  | 2.10148528592031  | 15.12777734259801 | 8.85257441316816  |
| C  | 3.15131177087993  | 16.43428952178237 | 10.20216676880198 |
| H  | 4.17535085017159  | 16.70895481166620 | 10.50883301987570 |
| H  | 2.65010823472665  | 15.99843233506937 | 11.08183853448151 |
| H  | 2.60637031439496  | 17.35393437147172 | 9.92847047630110  |
| C  | 3.90131448262163  | 14.12497104640354 | 9.46827533790419  |
| H  | 3.81734643154013  | 13.33129875122425 | 8.70847858514267  |
| H  | 3.45837177834673  | 13.73573168690960 | 10.40042407331983 |
| H  | 4.97097726452698  | 14.31212623165177 | 9.66615416769954  |
| C  | 1.72765568311980  | 16.75882790619118 | 4.15191142944197  |
| H  | 1.17834410144624  | 15.93615076264934 | 4.64581955115205  |
| C  | 2.05157911763611  | 16.32503221009825 | 2.70930984671503  |
| H  | 2.55904196285419  | 17.12887214819711 | 2.14893113863416  |
| H  | 1.10549773834486  | 16.10227391289464 | 2.18750371434059  |
| H  | 2.67584852975396  | 15.41732612507076 | 2.65887529064889  |
| C  | 0.82880605255779  | 18.00772542487616 | 4.12821751347097  |
| H  | 0.73031802321969  | 18.46839031197119 | 5.12840823435849  |
| H  | -0.17868113016211 | 17.72918238447106 | 3.77640094506085  |
| H  | 1.21315620669467  | 18.78123969894698 | 3.44106732504945  |

|   |                   |                   |                   |
|---|-------------------|-------------------|-------------------|
| C | 4.36316758695779  | 20.25667733190631 | 7.09012079128915  |
| H | 3.84255384437259  | 20.34206723794507 | 8.06061770548868  |
| C | 3.53250594196274  | 21.00589252358745 | 6.03828414542399  |
| H | 4.03788139303410  | 21.04288945051395 | 5.05704629028533  |
| H | 3.38687185388671  | 22.04699214258853 | 6.37133999376898  |
| H | 2.53381034539799  | 20.55740587745561 | 5.90346342247595  |
| C | 5.75775985124280  | 20.89786188778017 | 7.22848090226720  |
| H | 6.34098027640795  | 20.46721126823815 | 8.05883818828292  |
| H | 5.63500075296244  | 21.97480336944792 | 7.43580010746120  |
| H | 6.34884513116063  | 20.80645468899652 | 6.29954624847518  |
| C | 3.48250006331556  | 15.04896174855680 | 6.63658269378266  |
| H | 2.47286036792629  | 14.61323066669219 | 6.71718834896222  |
| H | 4.20380656573828  | 14.21548774893533 | 6.73485953509512  |
| C | 3.68830142371845  | 15.67683010757613 | 5.24992572225282  |
| H | 4.76047383007907  | 15.85069606580349 | 5.06710123872045  |
| H | 3.37791967604147  | 14.92692184786713 | 4.50364991102331  |
| C | 3.85787535928646  | 18.01015473891056 | 4.47199995966265  |
| H | 3.23731105207712  | 18.87881305146014 | 4.20104068470765  |
| H | 4.34689980778588  | 17.65126323820334 | 3.54580500676010  |
| C | 4.94473621031692  | 18.44138172934450 | 5.46497176722936  |
| H | 5.71244550941324  | 17.65802334261317 | 5.56391605512658  |
| H | 5.47093558495070  | 19.31239384542608 | 5.03829562215474  |
| C | 5.14988864704732  | 18.07040567107285 | 7.90470964818030  |
| H | 4.75374601761494  | 18.45554699372391 | 8.85915421360026  |
| H | 6.22679486838642  | 18.32665184718805 | 7.86841799698971  |
| C | 5.04836774539529  | 16.53880941212844 | 7.86229025072972  |
| H | 5.63039204186424  | 16.13768437784473 | 7.01781110948325  |
| H | 5.53582054777250  | 16.14774126665458 | 8.77035792587959  |
| C | 0.10091288029653  | 18.36011164620896 | 9.03028895145976  |
| C | -0.50679189561802 | 18.78416532063181 | 10.23166392854681 |
| H | -0.31816784031787 | 19.80071594234557 | 10.59287905747303 |
| C | -1.32430485280685 | 17.91334619026414 | 10.96757979144994 |
| H | -1.77838897906079 | 18.25939417298788 | 11.90200646132065 |
| C | -1.55059532574593 | 16.60140097039845 | 10.51558178126116 |
| H | -2.18453517596353 | 15.91807523569429 | 11.09010156602901 |
| C | -0.96925535263660 | 16.16878081073260 | 9.31284379107703  |
| H | -1.15800871710921 | 15.15679959602990 | 8.93779652849912  |
| C | -0.15438347784541 | 17.04234155033125 | 8.57482436094490  |
| N | 3.64158630644661  | 16.02395752825306 | 7.76441450511621  |
| N | 2.94652592564475  | 16.96998204259250 | 5.03702283600761  |
| N | 4.39033147109098  | 18.76152959241522 | 6.81819163422109  |
| N | 0.46835527199041  | 16.64041241784605 | 7.32942615897283  |
| H | -0.05579783527863 | 17.06749310988213 | 6.54937022839693  |
| H | 0.36655946810878  | 15.61480422987258 | 7.18577367420985  |
| C | 0.54352474342992  | 11.70488864981567 | 8.25694861550216  |
| F | 1.75534413005943  | 11.38193369879746 | 7.75406432941361  |

|   |                   |                   |                  |
|---|-------------------|-------------------|------------------|
| F | -0.06479118839177 | 10.56826630267462 | 8.65694540879449 |
| F | 0.73060719859330  | 12.48913877375636 | 9.34064642995204 |
| S | -0.50336130979330 | 12.59901381759159 | 6.95932221845469 |
| O | 0.32880425552187  | 13.80627635816347 | 6.63891380537393 |
| O | -0.60328279971745 | 11.61755708381665 | 5.84548002850081 |
| O | -1.77441921449208 | 12.89557838537303 | 7.67653944562561 |

**S4.** Optimized coordinates for **4** calculated using BP86.

|    | <b>X</b>  | <b>Y</b>  | <b>Z</b>  |
|----|-----------|-----------|-----------|
| Fe | 11.817595 | 13.568092 | 11.776051 |
| S  | 13.206859 | 11.697466 | 11.306417 |
| C  | 14.549778 | 14.006701 | 13.478973 |
| H  | 14.932223 | 13.526522 | 12.560208 |
| C  | 15.666368 | 14.897428 | 14.056943 |
| H  | 16.073590 | 15.602485 | 13.314643 |
| H  | 16.497690 | 14.252681 | 14.389635 |
| H  | 15.325445 | 15.474172 | 14.934922 |
| C  | 14.181786 | 12.897599 | 14.475083 |
| H  | 13.901367 | 13.301826 | 15.463224 |
| H  | 15.058528 | 12.245591 | 14.624990 |
| H  | 13.354599 | 12.270602 | 14.101688 |
| C  | 9.316233  | 13.347191 | 13.588502 |
| H  | 8.724175  | 13.301524 | 12.658116 |
| C  | 8.381192  | 13.810044 | 14.719946 |
| H  | 8.892667  | 13.803288 | 15.697744 |
| H  | 7.529024  | 13.113009 | 14.785194 |
| H  | 7.967856  | 14.817502 | 14.545763 |
| C  | 9.878865  | 11.948534 | 13.896463 |
| H  | 10.703481 | 11.670360 | 13.212964 |
| H  | 9.080522  | 11.195341 | 13.788633 |
| H  | 10.263461 | 11.871167 | 14.927934 |
| C  | 11.647439 | 15.377860 | 9.249053  |
| H  | 10.933753 | 14.573564 | 8.994171  |
| C  | 11.206172 | 16.652985 | 8.506281  |
| H  | 10.170799 | 16.945098 | 8.744627  |
| H  | 11.254367 | 16.463821 | 7.419919  |
| H  | 11.869962 | 17.509037 | 8.721062  |
| C  | 13.046275 | 14.938913 | 8.793528  |
| H  | 13.797753 | 15.734819 | 8.938788  |
| H  | 13.016169 | 14.705722 | 7.716112  |
| H  | 13.386086 | 14.033780 | 9.325271  |
| C  | 12.557778 | 15.372438 | 14.152176 |



|   |           |           |           |
|---|-----------|-----------|-----------|
| H | 12.327951 | 16.422267 | 13.915084 |
| H | 13.174769 | 15.408467 | 15.066469 |
| C | 11.271443 | 14.607021 | 14.478726 |
| H | 11.521637 | 13.636527 | 14.933108 |
| H | 10.697343 | 15.188569 | 15.224684 |
| C | 9.889536  | 15.606484 | 12.680376 |
| H | 10.301653 | 16.460038 | 13.240131 |
| H | 8.796153  | 15.645867 | 12.811608 |
| C | 10.154948 | 15.765761 | 11.174278 |
| H | 9.501805  | 15.082961 | 10.605857 |
| H | 9.861566  | 16.796459 | 10.896671 |
| C | 12.527895 | 16.477859 | 11.325824 |
| H | 11.986674 | 17.138223 | 12.021917 |
| H | 12.915433 | 17.138709 | 10.532490 |
| C | 13.723497 | 15.818165 | 12.024822 |
| H | 14.369707 | 15.319653 | 11.281868 |
| H | 14.322354 | 16.618501 | 12.500352 |
| C | 12.454963 | 11.322794 | 9.740130  |
| C | 13.167703 | 10.667005 | 8.710392  |
| H | 14.203069 | 10.362305 | 8.889646  |
| C | 12.578438 | 10.427886 | 7.465565  |
| H | 13.154023 | 9.931585  | 6.678501  |
| C | 11.255700 | 10.847856 | 7.222649  |
| C | 10.518589 | 11.479811 | 8.239150  |
| H | 9.485141  | 11.795155 | 8.068413  |
| C | 11.112337 | 11.708852 | 9.487499  |
| C | 10.615682 | 10.555385 | 5.894298  |
| N | 13.320641 | 14.771122 | 13.012487 |
| N | 10.435127 | 14.329594 | 13.268840 |
| N | 11.565595 | 15.478786 | 10.763218 |
| N | 10.386186 | 12.363635 | 10.557618 |
| H | 10.041943 | 11.638696 | 11.207024 |
| H | 9.535800  | 12.820094 | 10.166175 |
| F | 11.480671 | 10.731665 | 4.851287  |
| F | 10.179274 | 9.257260  | 5.799964  |
| F | 9.530098  | 11.340274 | 5.646440  |
| C | 6.049824  | 12.104729 | 10.419678 |
| F | 6.940274  | 11.450986 | 11.203182 |
| F | 5.837097  | 11.361598 | 9.314531  |
| F | 4.887466  | 12.206842 | 11.096238 |
| S | 6.714178  | 13.818185 | 9.963826  |
| O | 6.851911  | 14.500621 | 11.280027 |
| O | 8.018094  | 13.490437 | 9.292495  |
| O | 5.684330  | 14.379656 | 9.048295  |

S5. Optimized coordinates for **1-5coord** calculated using BP86.

|    | <b>X</b>           | <b>Y</b>          | <b>Z</b>          |
|----|--------------------|-------------------|-------------------|
| Fe | 2.37991293602685   | 17.63234338139706 | 7.10183592136542  |
| S  | 1.38512624367220   | 19.40650207475406 | 8.31668892520188  |
| C  | 3.35435407692761   | 15.68771853558651 | 9.24062689179600  |
| H  | 2.29841757977296   | 15.37692187537174 | 9.23902188110602  |
| H  | 3.47334390282045   | 16.52774504184316 | 9.94339690584819  |
| H  | 3.97993246218761   | 14.84031080537919 | 9.58384710223907  |
| C  | 1.70036445908680   | 16.37993983664160 | 4.32277397245523  |
| H  | 1.12469500658214   | 15.57301111347555 | 4.80182745293882  |
| H  | 2.01880288523864   | 16.04330359780255 | 3.31710785323222  |
| H  | 1.06082547009651   | 17.27098686277076 | 4.21131149845976  |
| C  | 4.25338182599303   | 20.18647447041118 | 6.80529247439560  |
| H  | 3.83922765569622   | 20.48121260366467 | 7.78177781195451  |
| H  | 3.59325089015885   | 20.56845301871658 | 6.01069557389280  |
| H  | 5.25824604673647   | 20.63736686911359 | 6.68738427295930  |
| C  | 3.54892154672571   | 15.01458095191387 | 6.90259557189242  |
| H  | 2.53238950068037   | 14.61637401881473 | 7.06424469420115  |
| H  | 4.26563716863566   | 14.19175655437053 | 7.09612371793135  |
| C  | 3.68910143603006   | 15.47921227963937 | 5.44575937716677  |
| H  | 4.74315337921032   | 15.67306888676393 | 5.19202687506157  |
| H  | 3.36283626337636   | 14.65877626617887 | 4.78342968718510  |
| C  | 3.68143316417627   | 17.77427019800616 | 4.48264654133769  |
| H  | 2.98486852019679   | 18.59221750501240 | 4.23070043249768  |
| H  | 4.10063013278377   | 17.39028396871543 | 3.53067811916299  |
| C  | 4.81545109457954   | 18.30114289793771 | 5.36514033559927  |
| H  | 5.60690491874699   | 17.54373864507866 | 5.47557576937861  |
| H  | 5.28960275640349   | 19.16146216866336 | 4.85991580981502  |
| C  | 5.18028568606041   | 18.17993905126242 | 7.82199496689762  |
| H  | 4.78350597968256   | 18.60424038668638 | 8.76143989475871  |
| H  | 6.22701512694322   | 18.53068055584179 | 7.71510637800550  |
| C  | 5.15350398206839   | 16.64921087147524 | 7.88616875802527  |
| H  | 5.70759650557741   | 16.21061461235449 | 7.04201489281861  |
| H  | 5.67712801622370   | 16.31629888181617 | 8.79989894046230  |
| C  | 0.22151802024629   | 18.32990222054522 | 9.14489290399393  |
| C  | -0.31765115586267  | 18.65028375455058 | 10.40953179286994 |
| H  | -0.02606996432390  | 19.59149860473400 | 10.88744548144226 |
| C  | -1.19927317015141  | 17.77238408174385 | 11.05747122859950 |
| H  | -1.60031641242355  | 18.03817865414769 | 12.04093568096050 |
| C  | -1.557044464979343 | 16.55403399413978 | 10.45391739138359 |
| H  | -2.23964283644340  | 15.86337952126645 | 10.95982450527567 |
| C  | -1.04440495933652  | 16.22598511112386 | 9.18887966310949  |
| H  | -1.32844231005546  | 15.28731955359548 | 8.70036880220155  |
| C  | -0.16951429036064  | 17.11013787067501 | 8.53682959369290  |

|   |                   |                   |                  |
|---|-------------------|-------------------|------------------|
| N | 3.74650973065676  | 16.12956991489772 | 7.87757398552325 |
| N | 2.87784555778082  | 16.71670867959493 | 5.16653683985238 |
| N | 4.31972179515005  | 18.70595922308595 | 6.72105492469888 |
| N | 0.38482252372972  | 16.80088296540690 | 7.22945440221849 |
| H | -0.13639346348217 | 17.32903658815882 | 6.50929136031113 |
| H | 0.23773792358636  | 15.79536186522351 | 7.00603561586822 |
| C | 0.49355057507934  | 11.93718650147214 | 8.14399005848943 |
| F | 1.71818316327622  | 11.61174612369161 | 7.67672378339345 |
| F | -0.11227911875967 | 10.80797921750589 | 8.56765161063393 |
| F | 0.65044925348245  | 12.75786284491783 | 9.20517044494506 |
| S | -0.53473522076542 | 12.77667300638102 | 6.79519061737333 |
| O | 0.28168454413505  | 13.99237096295120 | 6.46646798499289 |
| O | -0.58604544078933 | 11.76399633732047 | 5.70619575559751 |
| O | -1.83139671367284 | 13.06682361541045 | 7.46909627253020 |

**S6.** Optimized coordinates for **1-MeCN** calculated using BP86.

|    | <b>X</b>          | <b>Y</b>         | <b>Z</b>          |
|----|-------------------|------------------|-------------------|
| Fe | 1.39736887719674  | 3.76474160360278 | 1.96381491103939  |
| S  | -0.36272123573789 | 4.97565947127788 | 0.75359455637634  |
| N  | 3.06167238077494  | 2.61931302118691 | 3.03059638197137  |
| N  | 2.36023636082496  | 2.74604055720945 | 0.20612033829161  |
| N  | 3.18810161909000  | 5.14026896856408 | 1.62440553750029  |
| N  | 0.46277323318000  | 4.87824827809960 | 3.65260502132843  |
| O  | 3.81211017438244  | 7.01719465621081 | 5.73685282445734  |
| C  | -0.63308859197676 | 6.27233184339445 | 1.94427234113338  |
| C  | 2.68684354657120  | 2.22450409784481 | 4.41153275202314  |
| C  | 3.19728925786027  | 1.40619122378123 | 2.17414108345808  |
| C  | 4.32128699471923  | 3.43121262162579 | 3.05710016073150  |
| C  | 1.35586992660214  | 2.07457282928194 | -0.65227024132300 |
| C  | 3.37818080633333  | 1.75530673459362 | 0.68993567508797  |
| C  | 2.98434667523304  | 3.87674043607977 | -0.53847828249386 |
| C  | 2.81382300291604  | 6.57342903204204 | 1.54925214913975  |
| C  | 3.88487356627174  | 4.73199882787866 | 0.35998484081333  |
| C  | 4.03761194597598  | 4.91783453468985 | 2.82892026969948  |
| C  | -0.18239828334439 | 6.12478474386538 | 3.28324211458532  |
| H  | 1.03395183863114  | 5.01603419556494 | 4.50968478365424  |
| H  | -0.26415817977971 | 4.19507016636489 | 3.91411351414446  |
| S  | 2.83854836801899  | 6.40965421065310 | 6.68632658937494  |
| C  | -1.28054248958950 | 7.47789945235339 | 1.58847734741604  |
| H  | 1.71691408831073  | 1.70449906255423 | 4.39585322360630  |
| H  | 2.60288026123318  | 3.12556371319726 | 5.03988863794940  |
| H  | 3.44986795596356  | 1.55123626842387 | 4.85204620878774  |

|   |                   |                   |                   |
|---|-------------------|-------------------|-------------------|
| H | 2.27773400888412  | 0.81477257819407  | 2.31266222055556  |
| H | 4.05085529302512  | 0.77958504003778  | 2.50790076150643  |
| H | 5.01449074358409  | 3.04454554362419  | 2.29327531018861  |
| H | 4.83534180045025  | 3.30637644863657  | 4.02735971666485  |
| H | 0.58386336668214  | 2.80167495272965  | -0.95130090605824 |
| H | 0.87467211458818  | 1.26333100603089  | -0.08595068140703 |
| H | 1.82227179315849  | 1.65217544669185  | -1.56488651029129 |
| H | 4.38716928522610  | 2.15855319406578  | 0.50833912847873  |
| H | 3.31328541386352  | 0.82487832400696  | 0.09912388179048  |
| H | 2.15649336083720  | 4.49364994860463  | -0.92788599008493 |
| H | 3.57163432292012  | 3.50855177231391  | -1.40551163065273 |
| H | 2.26728168272025  | 6.86206554378869  | 2.45995342993481  |
| H | 2.15596318940261  | 6.73404009390600  | 0.68147248623563  |
| H | 3.71310919778046  | 7.21393992259839  | 1.45110436671469  |
| H | 4.80837590071294  | 4.18726285268466  | 0.61247152187394  |
| H | 4.20517490402535  | 5.62538223133254  | -0.20527840061951 |
| H | 3.49380688381685  | 5.33573904543012  | 3.69294790188956  |
| H | 4.99761662114912  | 5.46876049637924  | 2.74958035596209  |
| C | -0.35505713549567 | 7.16266172172510  | 4.21542444798302  |
| C | 3.93262672514521  | 5.52521118416862  | 7.95443974505761  |
| O | 2.05476842775906  | 7.37735048690648  | 7.50393312230523  |
| O | 2.02970256429809  | 5.28008216097099  | 6.12346040386620  |
| H | -1.63631450754020 | 7.60244188451586  | 0.56040629383009  |
| C | -1.45503054926444 | 8.50963259537787  | 2.52239491653562  |
| C | -0.98421360949329 | 8.36056035077600  | 3.83854593691893  |
| H | 0.00017109852972  | 7.02270604180917  | 5.24219305650063  |
| F | 4.73346797301710  | 6.41053484582844  | 8.58890203919060  |
| F | 3.17811970963018  | 4.89809174213722  | 8.88239268471414  |
| F | 4.71515098790309  | 4.60398344242574  | 7.35249772532867  |
| H | -1.95344989961282 | 9.43611466740530  | 2.21700191454779  |
| H | -1.11435281542564 | 9.16379200529405  | 4.57123156126489  |
| N | 0.10843044497907  | 2.17010273823943  | 2.42940600223816  |
| C | -0.76039284155729 | 1.40858964449238  | 2.62338240867760  |
| C | -1.84599340598473 | 0.46874714386759  | 2.85486949385239  |
| H | -2.75199836967754 | 0.81019166478152  | 2.32695770976925  |
| H | -2.06530903973250 | 0.39670236959691  | 3.93317083157324  |
| H | -1.56850773996569 | -0.52968168171528 | 2.47702000441128  |

**S7. Optimized coordinates for 1-PrCN calculated using BP86.**

|    | <b>X</b>          | <b>Y</b>         | <b>Z</b>         |
|----|-------------------|------------------|------------------|
| Fe | 1.46172735584659  | 3.40734720770498 | 1.99409301527404 |
| S  | -0.47768283091086 | 4.43793203195962 | 0.91545610852616 |

|   |                   |                  |                   |
|---|-------------------|------------------|-------------------|
| C | -0.43957085247609 | 0.88365350065362 | 2.75929026011753  |
| C | 1.36873801001924  | 1.72349718246488 | -0.63183382589875 |
| H | 0.49443698599402  | 2.36172409089689 | -0.83692655236412 |
| H | 1.03904506421899  | 0.85814923792486 | -0.03759899889371 |
| H | 1.78596987142921  | 1.36474080472573 | -1.59408073200111 |
| C | 3.09262938625517  | 1.99278083645131 | 4.29172644110929  |
| H | 2.17965907563572  | 1.37954512522835 | 4.34570414692760  |
| H | 2.96453942459793  | 2.88481827305412 | 4.92567075591784  |
| H | 3.94932749494318  | 1.40004664044006 | 4.67181882301273  |
| C | 2.57952264705893  | 6.35142887328295 | 1.50647457112286  |
| H | 2.09286127652978  | 6.58066370580727 | 2.46603684998026  |
| H | 1.83580027959008  | 6.46748576136417 | 0.70329295591415  |
| H | 3.40957407221852  | 7.06825501555336 | 1.34474003405803  |
| C | 3.52320101294668  | 1.60639668798647 | 0.52058417877144  |
| H | 4.46845508013720  | 2.10937593587930 | 0.26015561476496  |
| H | 3.50255000492895  | 0.67773735052140 | -0.07657659051450 |
| C | 3.50377057378467  | 1.23215232628866 | 2.01017448666152  |
| H | 2.66194853590776  | 0.55169848305478 | 2.21803442621123  |
| H | 4.43971282278078  | 0.69018128302064 | 2.26275580383635  |
| C | 4.49532090603619  | 3.34932710328277 | 2.82408132583451  |
| H | 5.16020112397740  | 3.03042458084893 | 2.00614634197548  |
| H | 5.09316561486365  | 3.27230030284418 | 3.75053551217504  |
| C | 4.05579656766928  | 4.80326406574920 | 2.63739834044429  |
| H | 3.56299783354239  | 5.16778338078476 | 3.55396786650824  |
| H | 4.95040572311058  | 5.44044375515298 | 2.47527419223714  |
| C | 3.69303585823726  | 4.62652740837209 | 0.18939549874509  |
| H | 4.69211824555212  | 4.18946579807071 | 0.34490097812777  |
| H | 3.85771094824164  | 5.55227311591029 | -0.39078971935592 |
| C | 2.80865058323851  | 3.68480308380230 | -0.63693611540522 |
| H | 1.88885383673559  | 4.21402479396122 | -0.93960325987177 |
| H | 3.34941438480634  | 3.38759999517558 | -1.56017372853343 |
| N | 2.37411875086507  | 2.49098900971641 | 0.14040800180107  |
| N | 3.32173022505361  | 2.42048406710837 | 2.88898849135438  |
| N | 3.08113400018593  | 4.95468949831761 | 1.51985333821277  |
| C | -0.75435281323427 | 5.72715429503152 | 2.11295726356698  |
| C | -1.49946317222493 | 6.88514902687600 | 1.79397415291728  |
| H | -1.92897116488087 | 6.97653228410861 | 0.79098376120241  |
| C | -1.67438662138801 | 7.91383120516904 | 2.73139318341185  |
| H | -2.24852482834665 | 8.80493264086534 | 2.45466825683349  |
| C | -1.10629559702396 | 7.80896022191163 | 4.01287699906495  |
| H | -1.23510082260375 | 8.61123601826519 | 4.74689934335939  |
| C | -0.37849803030736 | 6.65740051046916 | 4.35454268279808  |
| H | 0.05737898547227  | 6.55362246730130 | 5.35440369362380  |
| C | -0.20511596478636 | 5.62296788834629 | 3.41871949251688  |
| N | 0.54924538903750  | 4.42726800170431 | 3.74784060924630  |
| H | 1.14784221837844  | 4.60516166801471 | 4.57996610149914  |

|   |                   |                   |                  |
|---|-------------------|-------------------|------------------|
| H | -0.11087552010535 | 3.69022850520246  | 4.03946292159649 |
| N | 0.37420292905692  | 1.69872765963756  | 2.53983462124166 |
| O | 3.91497188035116  | 6.50707443967489  | 5.75166375704683 |
| S | 2.93510976987535  | 5.92926417955380  | 6.71335297966565 |
| O | 2.12755473183189  | 6.91635470547236  | 7.48004174678333 |
| C | 4.02109550080165  | 5.10349722535364  | 8.02792741824977 |
| F | 4.80361037722642  | 6.01814582382589  | 8.64239326480365 |
| F | 3.26158798237439  | 4.49850842475580  | 8.96656581514520 |
| F | 4.82261745682739  | 4.17031532102431  | 7.46833344536003 |
| O | 2.14917242315834  | 4.76559564148839  | 6.18271725924519 |
| C | -1.48811594499079 | -0.10423749637827 | 2.99762444106878 |
| C | -2.65543415317207 | 0.01044481195120  | 1.98099051903449 |
| H | -1.86092364381808 | 0.02668889715088  | 4.03093321894414 |
| H | -1.02814101794632 | -1.10920451729453 | 2.94779436173568 |
| C | -3.73910062769465 | -1.03567532278047 | 2.26838967604104 |
| H | -2.25708518988640 | -0.11994191205894 | 0.95949497591795 |
| H | -3.08008638742969 | 1.02819334127188  | 2.03510831138248 |
| H | -3.33657568952366 | -2.06155271960514 | 2.19163290031574 |
| H | -4.56739362993697 | -0.94068804083228 | 1.54613322372374 |
| H | -4.15767871864360 | -0.90964550883748 | 3.28273076587437 |

**S8.** Optimized coordinates for **1-MeOH** calculated using BP86.

|    |                   |                  |                   |
|----|-------------------|------------------|-------------------|
| Fe | 1.63462421842650  | 3.80855971122008 | 1.95926696290415  |
| S  | -0.19245650065474 | 4.92945629077938 | 0.83720327490369  |
| C  | -0.51460318445788 | 0.91501655070398 | 2.67541802025299  |
| C  | 1.41614340376300  | 2.08766217437002 | -0.65185687917034 |
| H  | 0.68042863642230  | 2.84871154324001 | -0.95556437662019 |
| H  | 0.89743097123570  | 1.30846756680500 | -0.07318547369542 |
| H  | 1.85691455541702  | 1.62924373736698 | -1.55963744654238 |
| C  | 2.77767288436825  | 2.15008798584291 | 4.38549544618536  |
| H  | 1.77451857950782  | 1.69539171187569 | 4.38071132229477  |
| H  | 2.75834360405745  | 3.04202287388523 | 5.03116056807377  |
| H  | 3.49832700238293  | 1.41838033763278 | 4.80356801349379  |
| C  | 3.05383984397140  | 6.52505272294522 | 1.55324476671057  |
| H  | 2.52761780672180  | 6.81022863719096 | 2.47696915402879  |
| H  | 2.38792070708396  | 6.71078937633441 | 0.69652936193090  |
| H  | 3.96612182265932  | 7.14385963526964 | 1.45205287281166  |
| C  | 3.43976487510010  | 1.68399689217970 | 0.66068281971092  |
| H  | 4.46309080769645  | 2.05372980231276 | 0.48939973750305  |
| H  | 3.34392479652137  | 0.76382470937055 | 0.05795628625129  |
| C  | 3.23666655613193  | 1.33004884358786 | 2.13932090484620  |
| H  | 2.28933895597407  | 0.78037574211459 | 2.26708012241792  |
| H  | 4.05537490028847  | 0.65894836275841 | 2.47264319261589  |

|   |                   |                  |                   |
|---|-------------------|------------------|-------------------|
| C | 4.44998135086942  | 3.29919206519412 | 3.02234740364524  |
| H | 5.12010638657324  | 2.88150367318754 | 2.25449681910223  |
| H | 4.96378525845344  | 3.15020501234570 | 3.98890483422022  |
| C | 4.24763897638750  | 4.80186811555670 | 2.79873080361505  |
| H | 3.74714933346427  | 5.25866150209991 | 3.66805528433203  |
| H | 5.23635791418889  | 5.29385703555815 | 2.69702268892139  |
| C | 4.05639322885017  | 4.65219961578838 | 0.32235469781129  |
| H | 4.96755758493768  | 4.08181728199057 | 0.56242289771319  |
| H | 4.39017474710213  | 5.53894834829446 | -0.24420568580232 |
| C | 3.11535853720492  | 3.82350191212091 | -0.56177833004397 |
| H | 2.30631590241700  | 4.46598085622369 | -0.94929012918347 |
| H | 3.68084598187496  | 3.43002848780886 | -1.43149889051365 |
| N | 2.45791563704761  | 2.71786449488871 | 0.19461760027996  |
| N | 3.15253625648002  | 2.54358366405163 | 3.00426835117469  |
| N | 3.39706267540841  | 5.08053005035404 | 1.60252209914717  |
| C | -0.58047341594837 | 6.12840141573056 | 2.10255997869472  |
| C | -1.35496361809208 | 7.27567787252490 | 1.82322543586061  |
| H | -1.74667155237999 | 7.41365708363205 | 0.80974519013030  |
| C | -1.61108792433779 | 8.23551646124223 | 2.81396112650946  |
| H | -2.20717909966385 | 9.12140915122613 | 2.56875405566821  |
| C | -1.09931481312990 | 8.06427355465864 | 4.11200231932938  |
| H | -1.29506678866714 | 8.80876576160946 | 4.89076158990491  |
| C | -0.34218159683295 | 6.92000369989369 | 4.41142493766361  |
| H | 0.04162425216676  | 6.75859085388046 | 5.42481383404491  |
| C | -0.08393468965055 | 5.95730776761882 | 3.42026921952526  |
| N | 0.70845766583956  | 4.77609858175683 | 3.70876014183125  |
| H | 1.23919011638961  | 4.91711578577400 | 4.59023097013552  |
| H | 0.07339458255170  | 3.97867942144028 | 3.88950447530879  |
| O | -0.06603148070583 | 2.25689223063149 | 2.37725905435524  |
| O | 3.69575167438354  | 6.92205568146257 | 5.55450276551554  |
| S | 3.05638483793163  | 6.20099045666557 | 6.69050076354721  |
| O | 2.50345073408840  | 7.06339764670774 | 7.77111105712362  |
| C | 4.49955910952625  | 5.30315384434085 | 7.52528229227429  |
| F | 5.41994954314425  | 6.18829126799773 | 7.96527804937122  |
| F | 4.06715718367912  | 4.58126278453250 | 8.58092899758683  |
| F | 5.10599866547370  | 4.46106847605475 | 6.65783885204794  |
| O | 2.16211506026879  | 5.06625541432409 | 6.28615274373230  |
| H | -1.47203366482839 | 0.94188375392757 | 3.22290785226071  |
| H | 0.25017805201359  | 0.44889157544508 | 3.31389271991234  |
| H | -0.62963823276341 | 0.31791931916265 | 1.75378550960749  |
| H | -0.75265961433350 | 2.73215281450983 | 1.85224697273195  |

**S9.** Optimized coordinates for **2-5coord** calculated using BP86.

|    | <b>X</b>          | <b>Y</b>          | <b>Z</b>          |
|----|-------------------|-------------------|-------------------|
| Fe | 4.14426623559021  | 19.75922743157438 | 1.06487097470010  |
| S  | 2.09994445166270  | 20.83140531276815 | 0.45667464739845  |
| S  | 5.22747887937159  | 18.45702039749232 | 6.09743701579574  |
| C  | 4.16087160213796  | 20.02304742671733 | -2.09082079848070 |
| H  | 3.40274150163157  | 20.80805291978499 | -1.94594490137661 |
| H  | 3.65558578412245  | 19.04399374212842 | -2.10726373361402 |
| H  | 4.66574318253523  | 20.18254949101237 | -3.06396620547862 |
| C  | 5.07235932455399  | 16.87952105091765 | 1.90432528883205  |
| H  | 5.84887566359659  | 16.09059712639562 | 1.85737052307335  |
| H  | 4.15647574844717  | 16.50145396617848 | 1.42268829110838  |
| H  | 4.86395715535272  | 17.10634438481015 | 2.96058870736021  |
| C  | 5.65608192568258  | 21.65201019881093 | 2.90283782162375  |
| H  | 5.65316551942328  | 20.89282954042460 | 3.70147089872479  |
| H  | 4.69597959310450  | 22.19260495300495 | 2.91258470871807  |
| H  | 6.47548303882982  | 22.37207371286417 | 3.09803856558830  |
| C  | 6.10700423681426  | 18.91644209889799 | -1.13510254908689 |
| H  | 7.12693890418511  | 19.27568556474892 | -0.94786919975961 |
| H  | 6.09646723551914  | 18.56364585769075 | -2.18281373840298 |
| C  | 5.78766682104396  | 17.73130998305628 | -0.22673799650879 |
| H  | 4.87476722192536  | 17.22207517947942 | -0.57959952825811 |
| H  | 6.61904267524690  | 16.99852974874713 | -0.28143910717998 |
| C  | 6.72766510010626  | 18.65813273586724 | 1.92683001479657  |
| H  | 7.61505700393874  | 18.02203777843408 | 1.73729311437936  |
| H  | 6.49227754558676  | 18.58452600560261 | 3.00270973498640  |
| C  | 7.06292736834075  | 20.12484954080835 | 1.59889260274082  |
| H  | 7.77806582496338  | 20.49273451077707 | 2.35770992453331  |
| H  | 7.57211724465654  | 20.22036180417447 | 0.63200694950242  |
| C  | 5.85167623860765  | 22.00371559877556 | 0.50013985750592  |
| H  | 6.72410074894470  | 22.68001801762201 | 0.60310657660663  |
| H  | 4.94303516184617  | 22.61397705099159 | 0.64232394402898  |
| C  | 5.84432999958978  | 21.37966707793782 | -0.91667740935757 |
| H  | 5.33232969953242  | 22.08575232181536 | -1.58930488256737 |
| H  | 6.87013379960916  | 21.26677171253788 | -1.30680078939928 |
| N  | 5.13575981723034  | 20.05377784098022 | -0.96882471259338 |
| N  | 5.53147461008752  | 18.10990115917667 | 1.19772778050757  |
| N  | 5.83690887557545  | 20.98621690771142 | 1.58774900619422  |
| C  | 1.65020772501762  | 21.15758659627164 | 2.14671742155925  |
| C  | 0.83719306809145  | 22.25376263416748 | 2.50730628103523  |
| H  | 0.45477439102770  | 22.91486579017555 | 1.72401925240560  |
| C  | 0.53433301427832  | 22.51821926761489 | 3.84852817090587  |
| H  | -0.08784264254526 | 23.37947496005270 | 4.10612633707598  |
| C  | 1.04306606860488  | 21.68203056850123 | 4.85872568650838  |



|   |                   |                   |                  |
|---|-------------------|-------------------|------------------|
| C | 1.83832684915474  | 20.56940531552757 | 4.52261601830173 |
| H | 2.22603020404175  | 19.90246197857575 | 5.29917600420413 |
| C | 2.13149041060980  | 20.30685317032951 | 3.18024731798058 |
| C | 0.76270417608607  | 21.95353915054795 | 6.31051985418379 |
| C | 6.04897568453330  | 16.79751034002601 | 6.49614031532176 |
| N | 2.95541099354005  | 19.18212413608365 | 2.79020255799490 |
| H | 2.34717080901979  | 18.44613098073496 | 2.39029434327014 |
| H | 3.40068801048121  | 18.75700459229737 | 3.62946310267395 |
| O | 6.29505846060088  | 19.21645333092629 | 5.38421761798742 |
| O | 4.07495030614922  | 18.04498244088859 | 5.22796759827469 |
| O | 4.83681714076769  | 18.99580643592611 | 7.42636477600748 |
| F | 1.90210779032882  | 22.25299949668299 | 7.01215258439237 |
| F | 0.21502040085218  | 20.87041690490058 | 6.94533591380846 |
| F | -0.09409097989061 | 22.99323178448585 | 6.50024008913270 |
| F | 5.18774270905537  | 15.98265026794394 | 7.14067067200200 |
| F | 6.45141469789423  | 16.18010982757527 | 5.36444983722844 |
| F | 7.12934497290809  | 16.98329987904680 | 7.28446685110365 |

**S10.** Optimized coordinates for **2-MeCN** calculated using BP86.

|    |                  |                   |                   |
|----|------------------|-------------------|-------------------|
| Fe | 4.02526284722328 | 19.38671733255928 | 0.79079377018606  |
| S  | 2.15602574188341 | 20.97421566692667 | 0.49325075910326  |
| C  | 4.27524540186418 | 19.74330015502403 | -2.29447621522869 |
| H  | 3.42137691510618 | 20.42544168868578 | -2.15606251809822 |
| H  | 3.89296862979865 | 18.71409136865271 | -2.36441072727770 |
| H  | 4.79304308020137 | 20.00061511818833 | -3.23992752193948 |
| C  | 5.36627719451908 | 16.68806422570678 | 1.76969207455510  |
| H  | 6.23898277643988 | 16.00595846945956 | 1.81311411971278  |
| H  | 4.55037075276356 | 16.18867166104686 | 1.22617393649798  |
| H  | 5.03655701146569 | 16.90668276608972 | 2.79688015017228  |
| C  | 5.34041851457338 | 21.46550659029924 | 2.77016712711520  |
| H  | 5.38084205383873 | 20.70661972616520 | 3.56792793180694  |
| H  | 4.33410494616823 | 21.91045187461143 | 2.74275251766615  |
| H  | 6.07901837647298 | 22.26057379434781 | 2.99817798160322  |
| C  | 6.28841589311020 | 18.82621732015521 | -1.25429679742534 |
| H  | 7.25893154568577 | 19.30884506989319 | -1.07321710183447 |
| H  | 6.32927261044993 | 18.44923407465661 | -2.29295335536170 |
| C  | 6.11218503491625 | 17.61810810216992 | -0.32485734249106 |
| H  | 5.30991649833557 | 16.97004043926384 | -0.71537956786168 |
| H  | 7.05009782596569 | 17.02466100871350 | -0.33079830935807 |
| C  | 6.78324569914961 | 18.64002338792000 | 1.87393243264077  |
| H  | 7.75417068235615 | 18.11547936915559 | 1.75807052299135  |
| H  | 6.48757150008489 | 18.54996870830519 | 2.93368183859981  |
| C  | 6.95422608188372 | 20.12412398479498 | 1.53114614078124  |

|   |                   |                   |                   |
|---|-------------------|-------------------|-------------------|
| H | 7.60038863722963  | 20.59261431754132 | 2.29758241577553  |
| H | 7.47609822384582  | 20.25529420851709 | 0.57527041636551  |
| C | 5.62003783345602  | 21.85412236216458 | 0.38974090972751  |
| H | 6.42733697282184  | 22.60102518659112 | 0.53958951858223  |
| H | 4.65535519825721  | 22.37857416489792 | 0.48414382188012  |
| C | 5.74434830180078  | 21.24431462461628 | -1.02755253784118 |
| H | 5.19053138460922  | 21.89708144989671 | -1.72080271492134 |
| H | 6.79312254381972  | 21.24881661389045 | -1.37189938235961 |
| N | 5.19073120065640  | 19.84977639435438 | -1.12889769971170 |
| N | 5.72100401375150  | 17.95518846960638 | 1.07691506743067  |
| N | 5.63792619773932  | 20.82903894405468 | 1.46437039136542  |
| C | 1.71557898459561  | 21.16600393586548 | 2.19755399860835  |
| C | 0.95028058716639  | 22.26970390584154 | 2.64504857935032  |
| H | 0.60532439588335  | 23.00704393410344 | 1.91372513771353  |
| C | 0.64406577343776  | 22.44170087043648 | 3.99805251125636  |
| H | 0.05694553472356  | 23.30762947489184 | 4.31721853663375  |
| C | 1.09781741239956  | 21.50181971719905 | 4.94401990968924  |
| C | 1.84437747616308  | 20.38571934088215 | 4.52199056421712  |
| H | 2.18570646408134  | 19.64112558970459 | 5.24776526025074  |
| C | 2.14434088116567  | 20.21266531689403 | 3.16447705389885  |
| C | 0.83524409249466  | 21.71380085262864 | 6.40704567545075  |
| N | 2.90217161960076  | 19.07093501896086 | 2.70211273735457  |
| H | 2.24498062041063  | 18.34828840801993 | 2.37096844822226  |
| H | 3.41156315930662  | 18.63866994477564 | 3.49874530857279  |
| N | 2.90681111851158  | 17.80120836755309 | -0.01356928709695 |
| F | 1.83640540696157  | 22.42447828973514 | 7.02443156603759  |
| F | 0.72948093905409  | 20.54238869687901 | 7.09954002026559  |
| F | -0.31425173708865 | 22.41439833984948 | 6.63692215593450  |
| O | 6.15410718727970  | 19.14404828487739 | 5.39289893699720  |
| S | 5.13635808168268  | 18.22364784223960 | 5.97773998739647  |
| O | 4.55800472555076  | 18.65024546006919 | 7.27983007411430  |
| C | 6.12964642580541  | 16.66842301035582 | 6.40571077296071  |
| F | 7.09600559347384  | 16.95745495474047 | 7.30414997330679  |
| F | 5.32658653313468  | 15.72179681283863 | 6.93731960643283  |
| F | 6.71671135941064  | 16.15578786835758 | 5.30324549534077  |
| O | 4.13244845503639  | 17.70176648093039 | 4.99175936921870  |
| C | 2.11581050313059  | 17.05498345244743 | -0.44837385453399 |
| C | 1.12157015460845  | 16.14238832418829 | -0.98949885807847 |
| H | 0.16304650671805  | 16.28044270775372 | -0.46196470198799 |
| H | 1.45536470972358  | 15.09967539126973 | -0.85359278008725 |
| H | 0.97089891333385  | 16.33445076678933 | -2.06532425028833 |

**S11.** Optimized coordinates for **2-PrCN** calculated using BP86.

|    | <b>X</b>          | <b>Y</b>          | <b>Z</b>          |
|----|-------------------|-------------------|-------------------|
| Fe | 3.97163144977133  | 19.23977673823040 | 0.74849530113204  |
| S  | 2.06948277151637  | 20.76106116643309 | 0.39922957405605  |
| C  | 4.19618600735772  | 19.54949138234358 | -2.34501891652106 |
| H  | 3.32498738905559  | 20.21075124512641 | -2.21429649139549 |
| H  | 3.84028076185626  | 18.50925722823315 | -2.38941423324926 |
| H  | 4.69958299567787  | 19.79903508993936 | -3.30065070611807 |
| C  | 5.40437323574504  | 16.59816483673015 | 1.76171469972840  |
| H  | 6.29841111287445  | 15.94494928949556 | 1.81750845834637  |
| H  | 4.60463302282906  | 16.06223322331208 | 1.22899555356753  |
| H  | 5.06892642720424  | 16.82664729169013 | 2.78485758121541  |
| C  | 5.24951449561031  | 21.38758614597210 | 2.68594445522696  |
| H  | 5.32538424587810  | 20.64598358102597 | 3.49710470403540  |
| H  | 4.22903616126291  | 21.79876055490053 | 2.66143508988611  |
| H  | 5.96414842047819  | 22.21067044326704 | 2.88994935684134  |
| C  | 6.24281363526600  | 18.71280331632156 | -1.30370250809484 |
| H  | 7.19913400132444  | 19.22683518800196 | -1.13302706500890 |
| H  | 6.29192703076159  | 18.32121052491355 | -2.33701876933556 |
| C  | 6.10622247215615  | 17.51446189750287 | -0.35462113225866 |
| H  | 5.31842759622910  | 16.83969501554106 | -0.72900081044051 |
| H  | 7.05958649251792  | 16.94534478259047 | -0.36071641720785 |
| C  | 6.76581181847687  | 18.58957781434182 | 1.82081336944237  |
| H  | 7.75058356217585  | 18.09072436532016 | 1.70420014056857  |
| H  | 6.48295001747544  | 18.50881995116480 | 2.88463568574324  |
| C  | 6.89059992957218  | 20.07281170701597 | 1.45464938825623  |
| H  | 7.52760813291036  | 20.57069820283428 | 2.21010089900762  |
| H  | 7.40153267399632  | 20.20594794308004 | 0.49263516751026  |
| C  | 5.49767534831560  | 21.74319808810510 | 0.29754667926816  |
| H  | 6.28588316811213  | 22.51410990085504 | 0.42842033183301  |
| H  | 4.52049262234839  | 22.24355119928126 | 0.39250866548794  |
| C  | 5.62566905774960  | 21.11628902241503 | -1.11264488811409 |
| H  | 5.04245463532555  | 21.74113606408519 | -1.80739515380154 |
| H  | 6.66989933710493  | 21.15034619073811 | -1.46996868862106 |
| N  | 5.11602785149774  | 19.70413499882659 | -1.18905964952080 |
| N  | 5.71743282991991  | 17.86217671330689 | 1.04371332926895  |
| N  | 5.55370428186092  | 20.73695873533903 | 1.38799348066164  |
| C  | 1.63108580759770  | 20.99677936081052 | 2.09958405437645  |
| C  | 0.84124673009652  | 22.09607485487906 | 2.51277193754418  |
| H  | 0.47731750133287  | 22.80020597245720 | 1.75843835167196  |
| C  | 0.53478242375120  | 22.30400229084759 | 3.86053560902338  |
| H  | -0.07228905241932 | 23.16527297854077 | 4.15427338462403  |
| C  | 1.01282962345484  | 21.40645224246463 | 4.83514472771137  |
| C  | 1.78465097605512  | 20.29546920295359 | 4.44766727787528  |

|   |                   |                   |                   |
|---|-------------------|-------------------|-------------------|
| H | 2.14522801201359  | 19.58340941921686 | 5.19651897175442  |
| C | 2.08497024174655  | 20.08624289567947 | 3.09503071773065  |
| C | 0.74555559624701  | 21.66217772292585 | 6.29137615228389  |
| N | 2.86788044259140  | 18.94743793276838 | 2.66592215773858  |
| H | 2.22395853596750  | 18.19949566732092 | 2.36692219033264  |
| H | 3.39255441032647  | 18.55196152283508 | 3.47332446909696  |
| N | 2.90327936920389  | 17.59958160387779 | -0.00280671699038 |
| F | 1.71134350238554  | 22.44613706818767 | 6.87229469776971  |
| F | 0.69918137462569  | 20.51574932694490 | 7.02815531308096  |
| F | -0.43719801795773 | 22.31429669543454 | 6.49751500838349  |
| O | 6.17092476917513  | 19.13068472078945 | 5.26365189379000  |
| S | 5.17565947047928  | 18.21271852646433 | 5.89110629126584  |
| O | 4.60658573421883  | 18.66627897251179 | 7.18608770097008  |
| C | 6.19920194275633  | 16.68493554592732 | 6.34623010460281  |
| F | 7.17309472154932  | 17.01102012653798 | 7.22276767998369  |
| F | 5.41915979963713  | 15.73904347662761 | 6.91161661721099  |
| F | 6.78035006770153  | 16.15283755949129 | 5.24811326047783  |
| O | 4.16917039208369  | 17.64659429963129 | 4.93023183196556  |
| C | 2.11433481736179  | 16.82158104733087 | -0.38605952891045 |
| C | 1.12702168464562  | 15.87462987296099 | -0.89562492541187 |
| C | 1.27365394526047  | 15.60235007410042 | -2.41658694752918 |
| H | 0.12463817849238  | 16.28496234879622 | -0.66988193372332 |
| H | 1.22210598102135  | 14.93421758718870 | -0.32154982213300 |
| C | 0.21568060083378  | 14.60330163490375 | -2.90189198439593 |
| H | 2.28732923558816  | 15.21211397550956 | -2.61571142926837 |
| H | 1.17966255996710  | 16.55675645822175 | -2.96290894910254 |
| H | 0.30913267895109  | 13.63542871410818 | -2.37928362507740 |
| H | 0.32936337495744  | 14.41734639311849 | -3.98306978947730 |
| H | -0.80577242391372 | 14.98645206935491 | -2.72792123064090 |

**S12.** Optimized coordinates for **2-MeOH** calculated using BP86.

|    | <b>X</b>         | <b>Y</b>          | <b>Z</b>          |
|----|------------------|-------------------|-------------------|
| Fe | 4.16387564846446 | 19.50346988935880 | 0.89181986160417  |
| S  | 2.27616042444249 | 20.98825598264176 | 0.53186045648511  |
| C  | 4.34953855775015 | 19.76281728360936 | -2.21046104758702 |
| H  | 3.54409587668961 | 20.50415142469500 | -2.09036645256482 |
| H  | 3.90004579336630 | 18.75849838832237 | -2.23112483345074 |
| H  | 4.86764219385381 | 19.94257479285818 | -3.17353046228327 |
| C  | 5.32064569559680 | 16.71831086752361 | 1.84752233038855  |
| H  | 6.16555600026063 | 16.00123379183496 | 1.88147078075580  |
| H  | 4.47715956315080 | 16.24123561382902 | 1.32620271637103  |
| H  | 5.01730463752048 | 16.95787154990564 | 2.87756898437308  |

|   |                   |                   |                   |
|---|-------------------|-------------------|-------------------|
| C | 5.46948759838484  | 21.52983012914590 | 2.80351360055966  |
| H | 5.49744066188484  | 20.78020030379396 | 3.61020347559158  |
| H | 4.46919837379762  | 21.98892054460340 | 2.76550209478152  |
| H | 6.22083383977346  | 22.31479615349383 | 3.01794471142458  |
| C | 6.34215229403293  | 18.78976626827428 | -1.18605985563143 |
| H | 7.33102897419916  | 19.22457240558967 | -0.98562647453431 |
| H | 6.38169794242079  | 18.41680038896346 | -2.22634616850253 |
| C | 6.08993184010655  | 17.59482965316152 | -0.26100186783519 |
| H | 5.25389452684428  | 16.99283633410058 | -0.65645631236154 |
| H | 6.98961720935368  | 16.94469251155324 | -0.26174047451878 |
| C | 6.80242056329048  | 18.61777592271427 | 1.92446457903834  |
| H | 7.75189084566786  | 18.05621122263631 | 1.80732318724433  |
| H | 6.50699109582013  | 18.54194357109439 | 2.98472152111748  |
| C | 7.04250432781696  | 20.09646489576908 | 1.58651098885247  |
| H | 7.69611251200896  | 20.53199305639873 | 2.36471780031320  |
| H | 7.58094969227496  | 20.21105229546854 | 0.63822407500550  |
| C | 5.78668368521093  | 21.87688207426179 | 0.41093342822730  |
| H | 6.62119390644836  | 22.59205386838970 | 0.55774834315660  |
| H | 4.84202572357793  | 22.43911103452671 | 0.49246495703164  |
| C | 5.89504746845785  | 21.23223028311471 | -0.99331652751853 |
| H | 5.37211945115268  | 21.89078057091658 | -1.70457026673697 |
| H | 6.94530099782247  | 21.18706352924898 | -1.32864646504380 |
| N | 5.28935270520544  | 19.85781172151895 | -1.06388643437434 |
| N | 5.70882251631836  | 17.96482072364739 | 1.13457775467769  |
| N | 5.76188549469709  | 20.86900392071484 | 1.50601906182261  |
| C | 1.73569023638434  | 21.13861864377624 | 2.21735754759963  |
| C | 0.88007774895423  | 22.18505712611525 | 2.63086377005209  |
| H | 0.51476922605992  | 22.89711845922597 | 1.88414191936097  |
| C | 0.50959289703906  | 22.33512073513518 | 3.97121024393097  |
| H | -0.14695744828554 | 23.15863751140589 | 4.26670448891901  |
| C | 0.98708805656084  | 21.42456948615046 | 4.93348234614890  |
| C | 1.82245941400818  | 20.36148093969431 | 4.54238210247838  |
| H | 2.17992498339736  | 19.63630094364813 | 5.28025092038909  |
| C | 2.18794089543493  | 20.21315257605367 | 3.19781841975802  |
| C | 0.65507962428284  | 21.61312473807789 | 6.38625475893349  |
| N | 3.05442369762534  | 19.13722704993760 | 2.77248589913315  |
| H | 2.48252501504386  | 18.37916636432944 | 2.36076397896678  |
| H | 3.52868607943917  | 18.71772704822492 | 3.59607142200019  |
| O | 2.63719023091488  | 17.97205697206867 | 0.06028794848495  |
| F | 1.59480819290625  | 22.36813656422327 | 7.04541083526476  |
| F | 0.58197568319002  | 20.43264423811127 | 7.06750799316743  |
| F | -0.53622849505503 | 22.25297528982493 | 6.57377568799846  |
| O | 6.23943545786515  | 19.31571889571891 | 5.44913844651087  |
| S | 5.29703662183924  | 18.32796082418833 | 6.05080589168792  |
| O | 4.78496796310402  | 18.67226420907449 | 7.40382810087089  |
| C | 6.37769290236784  | 16.80100644783780 | 6.34717371354574  |

|   |                  |                   |                   |
|---|------------------|-------------------|-------------------|
| F | 7.37598911758819 | 17.08879500995719 | 7.21015220923410  |
| F | 5.64539320649521 | 15.79294743130598 | 6.86725482604697  |
| F | 6.92876339434867 | 16.37219044720146 | 5.19122779217199  |
| O | 4.25572848951561 | 17.80854649763365 | 5.10321737505294  |
| C | 2.36643831997246 | 16.73008238359405 | -0.63093981822967 |
| H | 3.11420853063840 | 15.99737795005906 | -0.29651085719418 |
| H | 2.44305646032504 | 16.85826705282629 | -1.72556196589368 |
| H | 1.36079593395712 | 16.35963917654795 | -0.36991792342831 |
| H | 1.90952892641832 | 18.61211602037219 | -0.11723913884081 |

## Coordinates for DFT-calculated models for calibration curve

**S13.** Optimized coordinates for Fe<sup>II</sup>(TMCS)(PF<sub>6</sub>) calculated using TPSSh.

|    | X                 | Y                 | Z                 |
|----|-------------------|-------------------|-------------------|
| Fe | -0.15614768178075 | 0.25370250858757  | -0.19725937477747 |
| S  | 0.16043033274416  | -0.00706947297176 | 2.10493482579404  |
| N  | -0.14197748571966 | 2.44563746136890  | 0.20970925757447  |
| N  | 1.79208952063562  | 0.64682214382153  | -1.12609071182146 |
| N  | -0.22070772971904 | -1.84816242984641 | -0.94303644773210 |
| N  | -2.30064652076428 | 0.22454064250397  | -0.64269683391295 |
| C  | 2.91041770411751  | 0.29626892743057  | -0.20675341155696 |
| C  | -0.41017609819510 | 2.70015091326272  | 1.65736158113051  |
| C  | 0.35217667929761  | 1.76317593074994  | 2.59339348922267  |
| C  | 1.77857997386770  | 2.12596654805166  | -1.35061112441949 |
| C  | 1.24980736322371  | 2.87332389398252  | -0.12949075174520 |
| C  | -1.08652754452342 | 3.24955987090815  | -0.62713034282113 |
| C  | -2.54153126287928 | 2.77073684115341  | -0.64441796500620 |
| C  | -2.79273918728762 | 1.44278225430813  | -1.36362340753311 |
| C  | -3.11329134207538 | 0.02340323375472  | 0.58910234820042  |
| C  | 0.40276156175687  | -2.80764592489126 | 0.00461222973418  |
| C  | -2.47501690711247 | -0.95865930229566 | -1.54212679293081 |
| C  | -1.68077761128022 | -2.15789996994634 | -1.03379504553906 |
| C  | 0.38675482908355  | -2.02486253662867 | -2.30058198474297 |
| C  | 1.83463418569801  | -1.54517543811213 | -2.43842540539240 |
| C  | 2.01993177196203  | -0.02557563812185 | -2.44587761144709 |
| H  | 3.86877781275988  | 0.59255826634876  | -0.65572807347914 |
| H  | 2.91462551216153  | -0.77802901785196 | -0.02192639012761 |
| H  | 2.78288022831558  | 0.79661568077950  | 0.75230416429428  |
| H  | -1.48197291018737 | 2.55942423202284  | 1.81676516220125  |
| H  | -0.17070213669297 | 3.75020180793175  | 1.89088616310872  |
| H  | -0.04404525101877 | 1.89875976657869  | 3.60394886216515  |
| H  | 1.41763256412312  | 2.01446795926936  | 2.63284733457145  |
| H  | 1.14591860120963  | 2.31852516897400  | -2.22246929718057 |
| H  | 2.79095629403617  | 2.47905190665383  | -1.59220804722643 |
| H  | 1.27722777618116  | 3.95507365918698  | -0.32156476316363 |
| H  | 1.88857866012977  | 2.68522669446821  | 0.73526823382409  |
| H  | -1.05389056051361 | 4.29341996583805  | -0.27881139892216 |
| H  | -0.70837080398480 | 3.23714044499530  | -1.65276589166064 |
| H  | -2.98107249624966 | 2.77377330684686  | 0.35875806581296  |
| H  | -3.09924777599760 | 3.52884702157614  | -1.20740775315255 |
| H  | -2.30441326215205 | 1.46463037112012  | -2.33988273972349 |
| H  | -3.87315898245707 | 1.32225526954574  | -1.53320046299533 |
| H  | -4.17858609467963 | -0.04107469292548 | 0.32471296943654  |
| H  | -2.95685406318516 | 0.85163323558862  | 1.27957662393879  |

|   |                   |                   |                   |
|---|-------------------|-------------------|-------------------|
| H | -2.80561667436492 | -0.89049084421218 | 1.09819394354260  |
| H | 0.28335533241237  | -3.84078328542875 | -0.35403407899087 |
| H | -0.06908503175852 | -2.70541998364106 | 0.98388822023277  |
| H | 1.46668057312399  | -2.59032213791305 | 0.11229369484713  |
| H | -2.13785729478439 | -0.66537720612399 | -2.53965109240147 |
| H | -3.53943863971018 | -1.22210109907837 | -1.61521846627377 |
| H | -1.84684632061090 | -3.01990776327280 | -1.69500839914225 |
| H | -2.01987784400862 | -2.44552484564642 | -0.03517077576013 |
| H | 0.33050124721513  | -3.09286375179490 | -2.56072447758759 |
| H | -0.23155596896838 | -1.47863117985535 | -3.01749027660163 |
| H | 2.48987230504120  | -2.02985871886334 | -1.70737078117052 |
| H | 2.18032642659753  | -1.89733293255827 | -3.41806126598598 |
| H | 1.32357705001535  | 0.41601827598460  | -3.16217685263549 |
| H | 3.04020180201789  | 0.21663443833714  | -2.77901577564760 |
| P | -0.94836137306013 | 1.88754549302849  | -5.25058517444933 |
| F | -2.55666578410669 | 1.61009119461254  | -5.25298495037579 |
| F | -1.14702155509479 | 3.00682158864359  | -4.06902345965605 |
| F | -1.12873400824082 | 3.04191906823192  | -6.38351655028947 |
| F | 0.66544028388513  | 2.15193630878634  | -5.21339139784315 |
| F | -0.76675311846411 | 0.72277795355481  | -4.09348531451586 |
| F | -0.74178906998386 | 0.75820792319205  | -6.40706605129513 |

**S14.** Optimized coordinates for  $[\text{Fe}^{\text{III}}(\text{N3PyO}^{\text{Ph}_2})(\text{OMe})]\text{ClO}_4$  calculated using TPSSh

|    | <b>X</b>          | <b>Y</b>          | <b>Z</b>          |
|----|-------------------|-------------------|-------------------|
| Fe | -2.72350948258538 | 0.51425494600968  | 10.03225821054583 |
| C  | -6.23739813067322 | 3.32635828894970  | 11.93663306016410 |
| H  | -7.14147871987854 | 2.72715824116703  | 12.00964641847414 |
| C  | -6.32551717747332 | 4.67980285412300  | 11.60415665508324 |
| H  | -7.29880626934815 | 5.12760656211959  | 11.42421031351680 |
| C  | -5.16493874161605 | 5.45475438536019  | 11.50400029062029 |
| H  | -5.23318812455005 | 6.50939401055229  | 11.25238633062941 |
| C  | -3.91573910119904 | 4.86763447821836  | 11.73560090424658 |
| H  | -3.01242280742481 | 5.46842428373206  | 11.67572744012022 |
| C  | -3.82570132596193 | 3.51150741550717  | 12.05620327905169 |
| H  | -2.86202253726520 | 3.06310767654759  | 12.26634388712502 |
| C  | -4.98424186693722 | 2.72661769598602  | 12.15430822967411 |
| C  | -4.91809773639709 | 1.30989439650595  | 12.59649120729021 |
| C  | -5.74241105397855 | 0.91529523117991  | 13.66570950981513 |
| H  | -6.40696800338525 | 1.64505658817171  | 14.11503395990355 |
| C  | -5.66567411856773 | -0.37837523014533 | 14.16886769421984 |
| H  | -6.27885993022495 | -0.68264608355707 | 15.01124440756390 |
| C  | -4.76979705780799 | -1.27001437080004 | 13.57937839620714 |



|   |                   |                   |                   |
|---|-------------------|-------------------|-------------------|
| H | -4.66317598231611 | -2.28807983305175 | 13.93789333034513 |
| C | -4.00847875884170 | -0.82250461463106 | 12.50289353621948 |
| C | -3.13347006349747 | -1.79129710102456 | 11.72337850319477 |
| H | -2.91886042479175 | -2.67602009196789 | 12.33482110311607 |
| C | -3.94533012195126 | -2.19685027882549 | 10.49910725612741 |
| C | -4.65213843990113 | -3.39421538512783 | 10.47481357909871 |
| H | -4.55702301161785 | -4.10169161415171 | 11.29206689119565 |
| C | -5.47750740114708 | -3.65079766812288 | 9.37868147640414  |
| H | -6.04355211035733 | -4.57467762535448 | 9.31604056794728  |
| C | -5.54534597565943 | -2.70913182219414 | 8.35871421831653  |
| H | -6.15165050344460 | -2.89255896983287 | 7.47881977634593  |
| C | -4.78817989460275 | -1.52488359198453 | 8.43252108295474  |
| C | -4.84515882547133 | -0.57690587660232 | 7.29107831374215  |
| C | -6.09180164681111 | -0.28582532738547 | 6.70548870267500  |
| H | -7.00149990310162 | -0.68713551139939 | 7.14451730640591  |
| C | -6.17065116148084 | 0.53556777347320  | 5.57988130101216  |
| H | -7.14010759840459 | 0.76269667152907  | 5.14582698069065  |
| C | -5.00408018355498 | 1.06139287332042  | 5.01426187124869  |
| H | -5.06289616036815 | 1.69081884799626  | 4.13054151312391  |
| C | -3.76205123382366 | 0.77069954205981  | 5.58893628825419  |
| H | -2.85300070094195 | 1.17145243266491  | 5.14906665411601  |
| C | -3.67775180278651 | -0.03805982751136 | 6.72468178321798  |
| H | -2.70995339554079 | -0.25886528353881 | 7.16300190984363  |
| C | -1.10946875996593 | -0.54608929702350 | 12.41815725309037 |
| H | -0.33990128100467 | -1.25391706435730 | 12.74483878516969 |
| H | -1.78634031690388 | -0.38771409432773 | 13.26381506504641 |
| C | -0.49026338304430 | 0.78097555182193  | 12.04056308378871 |
| C | 0.69209908099570  | 1.24665280417849  | 12.62246968237961 |
| H | 1.22333098506538  | 0.62813470646046  | 13.33881322925215 |
| C | 1.17352544780186  | 2.50331084986448  | 12.26010075340434 |
| H | 2.09121460498237  | 2.88406405138763  | 12.69663749568916 |
| C | 0.46792307601103  | 3.25853837518863  | 11.31707609688220 |
| H | 0.81585531606899  | 4.23420142232098  | 10.99801411464182 |
| C | -0.69822536169681 | 2.72652620863479  | 10.77984009578221 |
| H | -1.28580222792254 | 3.25666654271783  | 10.03791201184174 |
| C | -1.04006853179970 | -2.05324803483018 | 10.47409964193312 |
| H | -1.68969331271311 | -2.46390107891039 | 9.69510347132332  |
| H | -0.71787175976532 | -2.87898817296041 | 11.12237960702682 |
| C | 0.14444542092853  | -1.37560539700065 | 9.84300447790677  |
| C | 1.44849854754748  | -1.84006603564203 | 10.04896369636914 |
| H | 1.61129015153257  | -2.67474545166982 | 10.72833266842020 |
| C | 2.53264970069406  | -1.25501258832160 | 9.38772778127464  |
| H | 3.54003234726290  | -1.62518841048359 | 9.55606812954002  |
| C | 2.30442102643850  | -0.18772793101630 | 8.50863723812256  |
| H | 3.13591413563267  | 0.28245502202626  | 7.99064798196892  |
| C | 1.01249570992804  | 0.29040289046647  | 8.29078527947349  |

|    |                   |                   |                   |
|----|-------------------|-------------------|-------------------|
| H  | 0.83381789082720  | 1.12211778565923  | 7.61539469475139  |
| C  | -0.08844837352776 | -0.29402933609578 | 8.95233025823055  |
| C  | -4.72118319113198 | 2.56634572234728  | 8.78177938462934  |
| H  | -4.70302763930262 | 2.62624080730425  | 7.68450351677812  |
| H  | -4.69658120785883 | 3.58277930564796  | 9.19690684539893  |
| H  | -5.66292410184192 | 2.09023293615340  | 9.08870697178827  |
| N  | -4.06415345490548 | 0.43352815869786  | 12.00893557153887 |
| N  | -4.00335469872853 | -1.27357997078455 | 9.51180441714690  |
| N  | -1.89078305435904 | -1.11256333880413 | 11.28219837904653 |
| N  | -1.17571119288937 | 1.52092582889438  | 11.14781044767702 |
| O  | -1.32018597281597 | 0.16751290793445  | 8.74842285292241  |
| O  | -3.61846817275060 | 1.83889496236680  | 9.23362446409433  |
| O  | 4.72601399126252  | 4.42819783932915  | 6.09472469864190  |
| O  | 3.01059531874443  | 2.75701245819305  | 6.57438942416078  |
| Cl | 3.85922107897769  | 3.36138783290395  | 5.50235785283323  |
| O  | 4.72158576795311  | 2.30607737141907  | 4.88725259053796  |
| O  | 2.98054388196179  | 3.96145477234424  | 4.44970584964817  |

**S15.** Optimized coordinates for  $[\text{Fe}^{\text{II}}(\text{N3PyO}^{\text{Ph}_2})(\text{MeCN})]\text{ClO}_4$  calculated using BP86.

|    | <b>X</b>          | <b>Y</b>          | <b>Z</b>          |
|----|-------------------|-------------------|-------------------|
| Fe | 0.52284883266456  | 2.59213614345854  | 12.89790268683380 |
| C  | -2.40492045590997 | -1.08854445481096 | 14.11211822579040 |
| H  | -3.31394123489055 | -0.73932512058738 | 14.61327943321811 |
| C  | -2.44893581987447 | -2.24154332257374 | 13.31597376952796 |
| H  | -3.39041845205053 | -2.79009657942170 | 13.20710676179819 |
| C  | -1.28810390560124 | -2.69060376373602 | 12.66211148682614 |
| H  | -1.31759684092764 | -3.59963733457074 | 12.05229564765088 |
| C  | -0.08938280346394 | -1.97025657673572 | 12.80054598161952 |
| H  | 0.82010945611674  | -2.31963018388523 | 12.30020295842839 |
| C  | -0.04367204958624 | -0.80577909080330 | 13.58331872455289 |
| H  | 0.89496831375089  | -0.25011202491760 | 13.68376054542605 |
| C  | -1.20358057637961 | -0.35484831757299 | 14.25006276922954 |
| C  | -1.17222314224854 | 0.82214209607082  | 15.16141266695299 |
| C  | -1.75809871128188 | 0.69577920656455  | 16.44177705626231 |
| H  | -2.21289010306391 | -0.25577312355930 | 16.72761469735316 |
| C  | -1.71665159611616 | 1.76293263272415  | 17.34238441105902 |
| H  | -2.14960755331548 | 1.66744183086021  | 18.34224368539043 |
| C  | -1.09115858692565 | 2.95149523087113  | 16.94212577522889 |
| H  | -1.02168481094530 | 3.81298050388658  | 17.61278492009591 |
| C  | -0.54549779140837 | 3.01834039096677  | 15.65504210662067 |
| C  | 0.02870549147738  | 4.33659052277100  | 15.12827571808093 |
| H  | 0.23304581787669  | 5.00845829919351  | 15.98487246613687 |

|   |                   |                  |                   |
|---|-------------------|------------------|-------------------|
| C | -1.06845301624087 | 4.94990373462818 | 14.26107248218602 |
| C | -1.92496201769569 | 5.92143075351349 | 14.79774427773976 |
| H | -1.73844256650298 | 6.33146621901182 | 15.79355121066452 |
| C | -3.01996860833798 | 6.33722005226805 | 14.03001891875447 |
| H | -3.71481665897589 | 7.09254279953200 | 14.41000549071545 |
| C | -3.19736584701753 | 5.78071979110236 | 12.76078482922729 |
| H | -4.02575647711787 | 6.10066675526905 | 12.12285866757816 |
| C | -2.26917516155283 | 4.83451326630149 | 12.26954134342036 |
| C | -2.43590111610956 | 4.32311060491150 | 10.88229206241511 |
| C | -1.35393385374975 | 4.32260069185401 | 9.97836117612946  |
| H | -0.37762509584618 | 4.67175645742504 | 10.32047803689021 |
| C | -1.53084295814868 | 3.89175261388997 | 8.65605836551511  |
| H | -0.68226097633257 | 3.88432046024696 | 7.96486498576285  |
| C | -2.79367937707436 | 3.45447008876623 | 8.22016333202931  |
| H | -2.92436638300360 | 3.10894440365182 | 7.18979421493795  |
| C | -3.88093657688082 | 3.45867390120164 | 9.11143484170137  |
| H | -4.86681248452703 | 3.11668055088360 | 8.77946822105377  |
| C | -3.70585129206327 | 3.89662438455619 | 10.43297006003591 |
| H | -4.55254716770607 | 3.88525203051089 | 11.12799298889474 |
| C | 1.78034746392662  | 5.27040983303831 | 13.62612360440526 |
| H | 2.56175464048516  | 5.77103914504539 | 14.22623704698097 |
| H | 0.95638245944827  | 5.99497991073715 | 13.50604207392408 |
| C | 2.31176995731401  | 4.92097811974836 | 12.24762856263357 |
| C | 3.33845182622702  | 5.66474061791330 | 11.64429171472906 |
| H | 3.81379822472365  | 6.48325337353350 | 12.19317234136102 |
| C | 3.74282655978582  | 5.33812925808283 | 10.34369824079097 |
| H | 4.54235281243634  | 5.90324348890206 | 9.85476768976627  |
| C | 3.11164593030954  | 4.27141173855185 | 9.68382276194683  |
| H | 3.39220274498554  | 3.97913307232482 | 8.66900280507933  |
| C | 2.09781227869058  | 3.57896584956404 | 10.35386795072041 |
| H | 1.56938342694197  | 2.74870381869641 | 9.87527549801814  |
| C | 2.31955211472244  | 3.45362849475352 | 15.19907756985966 |
| H | 1.83326562489817  | 2.62449143466362 | 15.74116147157942 |
| H | 2.64456608898081  | 4.20116782131792 | 15.95100965070712 |
| C | 3.51162939928444  | 2.92737424472740 | 14.43809187777036 |
| C | 4.81404941662015  | 3.35777650386306 | 14.74790033915303 |
| H | 4.94517840443456  | 4.14636801701246 | 15.50013119632763 |
| C | 5.93757933962605  | 2.78824899256329 | 14.12773692058329 |
| H | 6.94429271607020  | 3.13390294583598 | 14.38345831643033 |
| C | 5.75047349467957  | 1.76532393580373 | 13.17893058705350 |
| H | 6.61803734879450  | 1.30682047702771 | 12.69054319236870 |
| C | 4.46251107203483  | 1.32512161740072 | 12.84838334051071 |
| H | 4.30871760963252  | 0.52982263428511 | 12.11045412278796 |
| C | 3.31711014766889  | 1.89527655823521 | 13.46477746556113 |
| N | -0.57887856456542 | 1.98737120564011 | 14.76726943159153 |
| N | -1.21835289504645 | 4.41261575386055 | 13.02667934419142 |

|    |                   |                   |                   |
|----|-------------------|-------------------|-------------------|
| N  | 1.25646503802822  | 4.06921295090409  | 14.33302523254633 |
| N  | 1.69474567882473  | 3.89735880971502  | 11.60607595907189 |
| N  | -0.49312639053885 | 1.58043789878217  | 11.48610466238178 |
| C  | -0.98062646121655 | 0.92062470665121  | 10.65288255818244 |
| C  | -1.58705174351015 | 0.08505679916115  | 9.63102309126431  |
| H  | -1.52839995866415 | -0.97386955966230 | 9.93733744539500  |
| H  | -1.06638238812321 | 0.21344436173461  | 8.66433790472712  |
| H  | -2.64806130074875 | 0.35967382663840  | 9.50912333277756  |
| O  | 2.09392989530578  | 1.47300236379895  | 13.14968288686307 |
| O  | 1.65253810492143  | 1.10774280736038  | 4.91453165916807  |
| O  | 0.22169501164968  | 0.26620515798984  | 6.74378099505859  |
| O  | -0.37235110487193 | 2.36046219037471  | 5.57035806725307  |
| Cl | 0.77119507700431  | 1.51269282724712  | 6.07743933410011  |
| O  | 1.58844505581651  | 2.29941947245920  | 7.07682375464401  |

**S16.** Optimized coordinates for [Et<sub>4</sub>N]<sub>2</sub>[Fe<sup>III</sup>(N<sub>2</sub>S<sub>2</sub>)(Cl)] calculated using BP86.

|    |                   |                  |                  |
|----|-------------------|------------------|------------------|
| Fe | 4.13534344197520  | 4.02717561690294 | 4.91207984752432 |
| S  | 6.15661332490676  | 3.83291883924948 | 5.80043545347079 |
| S  | 4.81427857405838  | 3.56865366072502 | 2.84647620427740 |
| N  | 3.43057045298286  | 3.70210721153982 | 6.67815627724389 |
| N  | 2.36425301718895  | 3.52268423297225 | 4.33565139772422 |
| Cl | 3.71971896032289  | 6.55334016105551 | 4.89271529248558 |
| C  | 5.70133912391228  | 4.01649802638134 | 7.59694367874385 |
| C  | 4.21140999783301  | 3.65823451185010 | 7.80644036629549 |
| C  | 2.02943695617810  | 3.49534614555175 | 6.70033417969754 |
| C  | 1.20510480203851  | 3.40121921431203 | 7.84510872937654 |
| C  | -0.18058124871014 | 3.21110716924335 | 7.71179365098254 |
| C  | -0.76006110612999 | 3.10945175055800 | 6.43839173469513 |
| C  | 0.04073186765987  | 3.19944986716981 | 5.28734304291947 |
| C  | 1.43683719237184  | 3.39486535114347 | 5.39830207409034 |
| C  | 2.03248713332264  | 3.30581768633161 | 3.02184564753666 |
| C  | 3.15712951602583  | 3.58787641332689 | 1.99741418211808 |
| C  | 6.58859942702812  | 3.09384858603952 | 8.44850018302814 |
| C  | 5.89183608555108  | 5.48698225919732 | 8.03565563603922 |
| C  | 3.13310823613657  | 2.52595903341713 | 0.88673116989023 |
| C  | 2.90185199766144  | 4.98987181668260 | 1.39808848824601 |
| O  | 3.81305382009714  | 3.40471364044689 | 8.96414277769244 |
| O  | 0.91064849791408  | 2.95357910543729 | 2.59715523985982 |
| H  | 1.66625243943231  | 3.47537873092139 | 8.82906852132530 |
| H  | -0.80187262226338 | 3.14161532839293 | 8.61203418169554 |
| H  | -1.84055306229353 | 2.95863418132884 | 6.33013158795844 |
| H  | -0.39986179198960 | 3.11757094606518 | 4.29433497297131 |

|   |                   |                   |                  |
|---|-------------------|-------------------|------------------|
| H | 6.29247026889398  | 3.16362616234929  | 9.51077685604342 |
| H | 7.64837930233751  | 3.39037682131816  | 8.35413449257650 |
| H | 6.49473058760393  | 2.04106692270822  | 8.13063243115127 |
| H | 5.57961106648193  | 5.61050805550397  | 9.09051809784479 |
| H | 6.95557383681015  | 5.77169570047508  | 7.95227523980986 |
| H | 5.29481558328762  | 6.16240935050776  | 7.40111062032840 |
| H | 2.13872881989751  | 2.50948874684224  | 0.40631899493748 |
| H | 3.89525859000236  | 2.75621089794825  | 0.12208986129812 |
| H | 3.33718546976120  | 1.51983338711230  | 1.29121734087278 |
| H | 1.90504771121556  | 5.01928780054277  | 0.91800581918846 |
| H | 2.94798373413788  | 5.76053396773347  | 2.18609846240617 |
| H | 3.66774532123869  | 5.22053698023358  | 0.63744685937770 |
| N | 7.86213075011722  | 7.34269258039366  | 2.82321905516930 |
| C | 7.30385881886226  | 7.26145783495656  | 4.25095631956226 |
| C | 7.36296695028179  | 8.55221765561315  | 5.06128025328286 |
| C | 9.30350700958123  | 7.86348593550483  | 2.82134235252818 |
| C | 10.29549901639351 | 7.06288549594108  | 3.65846196276254 |
| C | 7.78598200946593  | 5.92330012504081  | 2.24845211384042 |
| C | 8.25464023383174  | 5.77635707365952  | 0.80375352273149 |
| C | 7.04543956945489  | 8.32270244376639  | 1.97253878485117 |
| C | 5.59163058996224  | 7.93385112821989  | 1.73051470910882 |
| H | 7.86960732727094  | 6.45934565260549  | 4.74767482243195 |
| H | 6.26580144063583  | 6.90348860955052  | 4.16369631688243 |
| H | 6.91520960584823  | 8.32771788543774  | 6.04355837451336 |
| H | 8.39011982806022  | 8.90856171866777  | 5.24012558610844 |
| H | 6.77143083971682  | 9.36886339544497  | 4.61681443346981 |
| H | 9.24422442675601  | 8.90419234338093  | 3.17168905404419 |
| H | 9.61193981656437  | 7.89080644132998  | 1.76568979171114 |
| H | 11.28106117080530 | 7.54498064097823  | 3.54325427692256 |
| H | 10.05029873118183 | 7.06766035390567  | 4.73256225215140 |
| H | 10.39827363137776 | 6.01949394449658  | 3.32033230179112 |
| H | 8.39160687393760  | 5.29941230963336  | 2.92207853168434 |
| H | 6.73845062045452  | 5.59874823964941  | 2.36449600769995 |
| H | 8.13700104678406  | 4.71528198424229  | 0.52560989512594 |
| H | 9.31786668919372  | 6.03076260739892  | 0.66452442586907 |
| H | 7.65302548369739  | 6.36631161099734  | 0.09410731234328 |
| H | 7.11522585919037  | 9.29148916327071  | 2.48831782791775 |
| H | 7.59185801170703  | 8.41947674915684  | 1.02214477421884 |
| H | 5.11945791481334  | 8.76775935396329  | 1.18317248728116 |
| H | 5.02212060266403  | 7.77527260800419  | 2.66108982534864 |
| H | 5.49192416774508  | 7.03029090589989  | 1.10851448366141 |
| N | 7.27278572637093  | -0.33384819442208 | 3.09531287609365 |
| C | 8.59888673221347  | -1.02364161060032 | 3.44539833093701 |
| C | 9.76172099172317  | -0.09910639880177 | 3.79082214101022 |
| C | 6.75032500344082  | 0.49353313859049  | 4.27929573878712 |
| C | 6.38963803734466  | -0.29327434911374 | 5.53277852491887 |

|   |                   |                   |                   |
|---|-------------------|-------------------|-------------------|
| C | 7.45053105381236  | 0.65113751563281  | 1.93518586043714  |
| C | 7.94055154845714  | 0.04738947692476  | 0.62321280720398  |
| C | 6.29228343290755  | -1.45223590663338 | 2.73052541163811  |
| C | 4.89810053073725  | -0.99787649835893 | 2.31553336250610  |
| H | 8.36809939202730  | -1.69577111090304 | 4.28475818277807  |
| H | 8.84590743188995  | -1.65460154288782 | 2.57904856029521  |
| H | 10.62269055785635 | -0.74440230751778 | 4.03318020126404  |
| H | 9.56603585523889  | 0.53158847071741  | 4.67245077857611  |
| H | 10.06221746710024 | 0.54539989935737  | 2.94918744873424  |
| H | 7.53031986835584  | 1.23786267159791  | 4.49461420283722  |
| H | 5.88546375535735  | 1.05941659137506  | 3.89767570110289  |
| H | 6.09239375864415  | 0.45360126093467  | 6.28830837836855  |
| H | 7.23567024358959  | -0.86447974518864 | 5.94805933221044  |
| H | 5.53520895090852  | -0.97277968196353 | 5.38386390760311  |
| H | 8.15238667659441  | 1.41344955519067  | 2.30579497113144  |
| H | 6.47594487975536  | 1.14977147690834  | 1.81477514184857  |
| H | 8.01676633675813  | 0.87196844087590  | -0.10559050074089 |
| H | 8.94002206929475  | -0.40897924346806 | 0.70609532754100  |
| H | 7.24171038500317  | -0.69572466617166 | 0.20596857752792  |
| H | 6.77577190948372  | -2.02378161205068 | 1.92441417653199  |
| H | 6.24880085326252  | -2.10331464648250 | 3.61588804741371  |
| H | 4.29262687134854  | -1.90520803659902 | 2.15428441699861  |
| H | 4.90028539376503  | -0.43165588229893 | 1.37031847406150  |
| H | 4.39402992552402  | -0.39499813527102 | 3.08750817164706  |

**S17.** Optimized coordinates for Fe<sup>II</sup>(tsalen)(py)(CO) calculated using TPSSh.

|    | <b>X</b>          | <b>Y</b>         | <b>Z</b>          |
|----|-------------------|------------------|-------------------|
| Fe | 0.27933228897034  | 2.60697940126843 | 1.38229641543002  |
| S  | 0.67628857156521  | 0.93318411125602 | -0.15117658873182 |
| S  | 1.89477844787799  | 1.59835567099715 | 2.66855149151887  |
| N  | -1.13289746853890 | 3.39989503237261 | 0.31042685957087  |
| N  | -0.09857290372258 | 4.01454410648962 | 2.67383758695884  |
| C  | 0.15639860960007  | 1.47063701131681 | -1.74704036374439 |
| C  | 0.64210604615128  | 0.74870849239318 | -2.86859654427493 |
| C  | 0.25368546907473  | 1.06354304920807 | -4.17285841634923 |
| C  | -0.64948184824479 | 2.12099767535633 | -4.41330445803633 |
| C  | -1.15024122389558 | 2.83687975128188 | -3.32813825561885 |
| C  | -0.76585344940198 | 2.54182262468599 | -1.98913528677166 |
| C  | -1.40243964590160 | 3.35008497774319 | -0.96517950318695 |
| C  | 2.11185537695536  | 2.42464144415953 | 4.20550689810548  |
| C  | 3.08281281630959  | 1.88827213077766 | 5.09450886290862  |
| C  | 3.33376327658194  | 2.45831933035108 | 6.34306184840238  |

|   |                   |                   |                   |
|---|-------------------|-------------------|-------------------|
| C | 2.62021973223997  | 3.60214730828502  | 6.76356054991302  |
| C | 1.66408976750715  | 4.14628545177946  | 5.91146863933113  |
| C | 1.38416589263859  | 3.58508841107493  | 4.63080144257705  |
| C | 0.37276799049719  | 4.28542297736897  | 3.86104885294656  |
| C | -1.97240758927758 | 4.27900529236658  | 1.14772831868112  |
| C | -1.04142022772042 | 5.00867700940943  | 2.10695262279547  |
| N | -1.20571768677124 | 1.38919011617823  | 2.29067112614346  |
| C | -2.14452888030474 | 0.76091532473960  | 1.54102060733931  |
| C | -3.14906728689097 | -0.04369366145553 | 2.09142246003603  |
| C | -3.19575618982453 | -0.21920462160072 | 3.48200249082443  |
| C | -2.23190305414334 | 0.43135457647705  | 4.26493564065802  |
| C | -1.26191392396695 | 1.21954002577963  | 3.63401464022191  |
| C | 1.52984344895363  | 3.51201420018597  | 0.62433409475264  |
| O | 2.38538150929123  | 4.12119937214421  | 0.10343758848243  |
| H | -0.03452058020461 | 5.17995781990874  | 4.35834178363588  |
| H | -2.21647382340111 | 3.99922914595709  | -1.32777188440440 |
| H | -0.49989943432414 | 1.73570547759414  | 4.22096228036299  |
| H | 1.34588561565918  | -0.07315117538850 | -2.69449667862934 |
| H | 0.65961342441876  | 0.48530631344961  | -5.00948047106856 |
| H | -0.95661616187749 | 2.37311391556411  | -5.43249666840180 |
| H | -1.86165438356680 | 3.65443720412467  | -3.49428312710020 |
| H | 3.64416723318376  | 1.00179695721182  | 4.77918260258164  |
| H | 4.09269910186606  | 2.01244923190498  | 6.99529458574010  |
| H | 2.81555310774306  | 4.05487356750407  | 7.73987644278322  |
| H | 1.10399574872246  | 5.03751881430342  | 6.21757106777346  |
| H | -2.67676615360115 | 3.64479146898402  | 1.71569240412828  |
| H | -2.55300586551486 | 4.98895282343794  | 0.53324744502819  |
| H | -1.60732165893209 | 5.52023986234002  | 2.90466169776353  |
| H | -0.45327163889273 | 5.76358541908662  | 1.55245207207950  |
| H | -2.07659900640053 | 0.91211326919339  | 0.46140461641854  |
| H | -3.87592675019067 | -0.52341562752817 | 1.43012247456668  |
| H | -3.96551559601236 | -0.84514422686959 | 3.94418239361426  |
| H | -2.21876104428381 | 0.33346314683124  | 5.35431734224452  |
